# Supplementary material for: A Genome-wide Survey and Systematic RNAi-based Characterization of Helicase-like Genes in Caenorhabditis elegans
Source: PubMed Central journal article supplement — DNA Res. 2007 Oct 6;14(4):183–99. doi: 10.1093/dnares/dsm016 (PMC2533593; doi:10.1093/dnares/dsm016), 2007-10-06
Supplement: dsm016_3.pdf [file dsm016_3.pdf]

**Supplementary Table 5A. Expression of helicase-like genes at different developmental stages.**

|                                                         | Whole genome   | Helicase     | Subfamily    |             |             |             |              |             |             |             |             |              |             |
|---------------------------------------------------------|----------------|--------------|--------------|-------------|-------------|-------------|--------------|-------------|-------------|-------------|-------------|--------------|-------------|
|                                                         |                |              | DEAD-box     | DEAH-box    | SKI2        | UPF1        | SWI2/SNF2    | MCM         | PIF1        | MPH1        | RAD3        | RECQ         | Others      |
| Total genes                                             | 18,010         | 134          | 37           | 11          | 8           | 10          | 28           | 6           | 10          | 4           | 5           | 4            | 11          |
| Total genes from the categories below (%)               | 4705<br>(26.1) | 66<br>(49.3) | 19<br>(51.4) | 7<br>(63.6) | 5<br>(62.5) | 3<br>(30.0) | 13<br>(46.4) | 5<br>(83.3) | 1<br>(10.0) | 2<br>(50.0) | 3<br>(60.0) | 4<br>(100.0) | 4<br>(36.4) |
| <b>Gene expression categories in hermaphrodites (%)</b> |                |              |              |             |             |             |              |             |             |             |             |              |             |
| Intrinsic                                               | 1250<br>(6.9)  | 29<br>(21.6) | 9<br>(24.3)  | 4<br>(36.4) | 2<br>(25.0) | 2<br>(20.0) | 4<br>(14.3)  | 0           | 1<br>(10.0) | 2<br>(50.0) | 2<br>(40.0) | 2<br>(50.0)  | 1<br>(9.1)  |
| Oogenesis-enriched                                      | 1030<br>(5.7)  | 29<br>(21.6) | 9<br>(24.3)  | 3<br>(27.3) | 1<br>(12.5) | 1<br>(10.0) | 4<br>(14.3)  | 5<br>(83.3) | 0           | 0           | 1<br>(20.0) | 2<br>(50.0)  | 3<br>(27.3) |
| Mixed oogenesis/somatic                                 | 622<br>(3.5)   | 3<br>(2.2)   | 1<br>(2.3)   | 0           | 1<br>(12.5) | 0           | 1<br>(3.6)   | 0           | 0           | 0           | 0           | 0            | 0           |
| Spermatogenesis enriched                                | 864<br>(4.8)   | 1<br>(0.8)   | 0            | 0           | 1<br>(12.5) | 0           | 0            | 0           | 0           | 0           | 0           | 0            | 0           |
| Mixed spermatogenesis/somatic                           | 479<br>(2.7)   | 1<br>(0.8)   | 0            | 1<br>(9.1)  | 0           | 0           | 0            | 0           | 0           | 0           | 0           | 0            | 0           |
| Soma enriched                                           | 460<br>(2.6)   | 4<br>(3.0)   | 0            | 0           | 0           | 0           | 4<br>(14.3)  | 0           | 0           | 0           | 0           | 0            | 0           |

Gene numbers in the columns for "Helicase" and for each "Subfamily" representing the total *C. elegans* helicase-like genes and the members in each subfamily are derived from Supplementary Table 2. The number in the "Whole genome" column represents all identified *C. elegans* genes and the indicated expression categories in hermaphrodites are from Reinke et al<sup>3</sup>. The percentage of the total gene number for each column is indicated in parentheses. "Others" contains the orphan genes.

**Supplementary Table 5B. Expression of helicase-like genes in the embryonic stages.**

|                                         | Whole genome   | Helicase     | Subfamily    |             |             |             |              |              |             |             |             |              |             |
|-----------------------------------------|----------------|--------------|--------------|-------------|-------------|-------------|--------------|--------------|-------------|-------------|-------------|--------------|-------------|
|                                         |                |              | DEAD-box     | DEAH-box    | SKI2        | UPF1        | SWI2/SNF2    | MCM          | PIF1        | MPH1        | RAD3        | RECQ         | Others      |
| Total gene number                       | 18,791         | 134          | 37           | 11          | 8           | 10          | 28           | 6            | 10          | 4           | 5           | 4            | 11          |
| Genes expressed at embryonic stages (%) | 8890<br>(47.3) | 84<br>(62.7) | 28<br>(75.7) | 9<br>(81.8) | 4<br>(50.0) | 4<br>(40.0) | 15<br>(53.6) | 6<br>(100.0) | 2<br>(20.0) | 3<br>(75.0) | 3<br>(60.0) | 4<br>(100.0) | 6<br>(54.5) |

Gene numbers in the "Helicase" and "Subfamily" columns are derived from Supplementary Table 2 and the gene number in the "Whole genome" column is from Baugh et al<sup>2</sup>.

"Others" contains the orphan genes.

**Supplementary Table 5C. Development- and sex-regulated expression of helicase-like genes.**

|                                                                       | Whole genome   | Helicase     | Subfamily                  |             |                           |             |              |              |                           |             |             |             |                           |
|-----------------------------------------------------------------------|----------------|--------------|----------------------------|-------------|---------------------------|-------------|--------------|--------------|---------------------------|-------------|-------------|-------------|---------------------------|
|                                                                       |                |              | DEAD-box                   | DEAH-box    | SKI2                      | UPF1        | SWI2/SNF2    | MCM          | PIF1                      | MPH1        | RAD3        | RECQ        | Others                    |
| Total genes                                                           | 17,871         | 134          | 37                         | 11          | 8                         | 10          | 28           | 6            | 10                        | 4           | 5           | 4           | 11                        |
| Genes described in the database (%)                                   |                | 85<br>(63.4) | 24<br>(64.9)               | 7<br>(63.6) | 6<br>(75.0)               | 5<br>(50.0) | 21<br>(75.0) | 6<br>(100.0) | 3<br>(30.0)               | 2<br>(50.0) | 3<br>(60.0) | 1<br>(25.0) | 7<br>(63.6)               |
| <b>Genes in “Male dominant groups”</b>                                |                |              |                            |             |                           |             |              |              |                           |             |             |             |                           |
| #10-11                                                                | 944            | 5            | 1                          | 0           | 0                         | 0           | 2            | 0            | 1                         | 0           | 0           | 1           | 0                         |
| #13-20                                                                | 3446           | 10           | 0                          | 0           | 2                         | 0           | 2            | 0            | 4                         | 1           | 0           | 0           | 1                         |
| #24-25                                                                | 535            | 4            | 0                          | 0           | 2                         | 1           | 1            | 0            | 0                         | 0           | 0           | 0           | 0                         |
| Total number of genes in all groups (%)                               | 4925<br>(27.6) | 17<br>(12.7) | 1<br>(2.7)                 | 0<br>(0.0)  | 3 <sup>*1</sup><br>(37.5) | 1<br>(10.0) | 5<br>(17.9)  | 0<br>(0.0)   | 3 <sup>*1</sup><br>(30.0) | 1<br>(25.0) | 0<br>(0.0)  | 1<br>(25.0) | 1<br>(9.1)                |
| <b>Genes in “Hermaphrodite dominant groups”</b>                       |                |              |                            |             |                           |             |              |              |                           |             |             |             |                           |
| #2                                                                    | 1513           | 21           | 6                          | 0           | 0                         | 0           | 4            | 6            | 0                         | 1           | 2           | 0           | 2                         |
| #4-7                                                                  | 1630           | 20           | 8                          | 1           | 1                         | 2           | 4            | 0            | 1                         | 0           | 1           | 0           | 2                         |
| #9                                                                    | 1272           | 4            | 1                          | 1           | 0                         | 0           | 1            | 0            | 0                         | 0           | 0           | 0           | 1                         |
| Total number of genes in all groups (%)                               | 4415<br>(24.7) | 43<br>(32.1) | 14 <sup>*1</sup><br>(37.8) | 2<br>(18.2) | 1<br>(12.5)               | 2<br>(20.0) | 9<br>(32.1)  | 6<br>(100.0) | 1 <sup>*2</sup><br>(10.0) | 1<br>(25.0) | 3<br>(60.0) | 0<br>(0.0)  | 4 <sup>*1</sup><br>(36.4) |
| <b>Genes in “Developmentally regulated groups” (without sex bias)</b> |                |              |                            |             |                           |             |              |              |                           |             |             |             |                           |
| #1                                                                    | 427            | 8            | 3                          | 2           | 1                         | 0           | 2            | 0            | 0                         | 0           | 0           | 0           | 0                         |
| #3                                                                    | 765            | 10           | 6                          | 1           | 0                         | 0           | 2            | 0            | 0                         | 0           | 0           | 0           | 1                         |
| #22                                                                   | 256            | 3            | 0                          | 1           | 0                         | 1           | 1            | 0            | 0                         | 0           | 0           | 0           | 0                         |
| Total number of genes in all groups (%)                               | 1448<br>(8.1)  | 21<br>(15.7) | 9<br>(24.3)                | 4<br>(36.4) | 1<br>(12.5)               | 1<br>(10.0) | 5<br>(17.9)  | 0<br>(0.0)   | 0<br>(0.0)                | 0<br>(0.0)  | 0<br>(0.0)  | 0<br>(0.0)  | 1<br>(9.1)                |

The indicated groups, group numbers, and gene numbers in the “Whole genome” column are derived from Jiang et al<sup>4</sup> and the gene numbers in the “Helicase” and each of the “Subfamily” columns are from Supplementary Table 2.

<sup>\*1</sup>A gene with multiple group numbers in the categorized group (e.g., Male dominant groups) was scored as one gene.

<sup>\*2</sup>A gene with multiple group numbers in two categorized groups such as *pif-1* was scored independently in each group.

“Others” contains orphan genes.
